# In vitro biosynthesis of poly- $\beta$ -1,4-glucan derivatives using a promiscuous glycosyltransferase

Gregory S. Bulmer<sup>1</sup>, Ashley P. Matthey<sup>1</sup>, Fabio Parmeggiani<sup>1,3</sup>, Ryan Williams<sup>2</sup>, Helene Ledru<sup>2</sup>, Andrea Marchesi<sup>1</sup>, Lisa S. Seibt<sup>1</sup>, Peter Both<sup>1</sup>, Kun Huang<sup>1</sup>, M. Carmen Galan<sup>2</sup>, Sabine L. Flitsch<sup>1</sup>, Anthony P. Green<sup>1</sup>, Jolanda M. van Munster<sup>1\*</sup>

<sup>1</sup> Manchester Institute of Biotechnology (MIB) & School of Natural Sciences, The University of Manchester, 131 Princess Street, Manchester, M1 7DN, United Kingdom

<sup>2</sup> School of Chemistry, University of Bristol, Cantock's Close, Bristol, BS8 ITS, United Kingdom

<sup>3</sup> Department of Chemistry, Materials and Chemical Engineering "G. Natta", Politecnico di Milano, Via Mancinelli 7, 20131, Milano, Italy

\* corresponding author, [jolanda.vanmunster@manchester.ac.uk](mailto:jolanda.vanmunster@manchester.ac.uk); [jolandavanmunster@gmail.com](mailto:jolandavanmunster@gmail.com)

## Abstract

The  $\beta$ -1,4-glucose linkage of cellulose is the most abundant polymeric linkage on earth and as such is of considerable interest in biology and biotechnology. It remains challenging to synthesize this linkage in vitro due to a lack of suitable biocatalysts; the natural cellulose biosynthetic machinery is a membrane-associated complex with processive activity that cannot be easily manipulated to synthesize tailor-made oligosaccharides and their derivatives. Here we identify a promiscuous activity of a soluble recombinant biocatalyst, *Neisseria meningitidis* glycosyltransferase LgtB, suitable for the polymerization of glucose from UDP-glucose via the generation of  $\beta$ -1,4-glycosidic linkages. We employed LgtB to synthesize natural and derivatized cello-oligosaccharides and we demonstrate how LgtB can be incorporated in biocatalytic cascades and chemo-enzymatic strategies to synthesize cello-oligosaccharides with tailored functionalities. We also show how the resulting glycan structures can be applied as chemical probes to report on activity and selectivity of plant cell wall degrading enzymes, including lytic polysaccharide monooxygenases. We anticipate that this biocatalytic approach to derivatized cello-oligosaccharides via glucose polymerization will open up new applications in biology and nanobiotechnology.

## Introduction

Cellulose, a linear polysaccharide consisting of  $\beta$ -1,4-linked glucose, is of critical importance in biotechnology, nutrition and microbial pathogenicity. As major structural component in plant cell walls, it is the predominant constituent of lignocellulosic waste, a highly abundant ( $2 \times 10^{11}$  tons per annum), energy-rich material that is exploited as a renewable resource in the bioeconomy<sup>1</sup>. Cellulose conversion to sugar monomers enables biotechnology for sustainable production of fuels and chemicals<sup>2</sup>. Hydrolytic enzymes are deployed to this aim in commercial-scale biorefineries producing lignocellulosic ethanol and identification of effective enzymes attracts much interest<sup>3-6</sup>. Lignocellulose-derived cellulose and its oligosaccharides also function as dietary fiber, whereby their fermentation by intestinal microbiota produces short-chain fatty acids that promote gut health<sup>7-9</sup>. Cellulose is a structural component of oomycete cell walls<sup>10</sup> and a potential target for

their biocontrol<sup>11</sup>; it is critical for pathogenicity of the causal agent of potato blight, a devastating crop disease costing \$5 billion per annum<sup>12</sup>. In bacterial biofilms associated with hard to eradicate, debilitating infections, cellulose functions as an essential matrix component, which is exploited as a biomarker for their detection<sup>13-19</sup>. Thus, cellulose and its oligosaccharide derivatives have a broad application range, from materials encountered in everyday life, such as paper and textiles, to state-of-the-art specialized materials such as probes for enzyme activity, biosurfactants, nanomaterials and biogels<sup>20-23</sup>.

Due to the important biological roles and application potential of cellulose and its oligosaccharides, the production of cellulose-based structures has attracted much attention. Synthetic chemists are only just starting to report the automated synthesis of  $\beta$ -1,4-linked glucose oligosaccharides, which is challenging due to the required stereo- and regioselectivity<sup>24,25</sup>. The enzymatic

synthesis of cellulose *in vitro* is challenging because the natural biosynthetic machinery consists of complex membrane-embedded multi component systems<sup>26</sup>, that are hard to express in functional form. Furthermore, biosynthesis is processive and is biased towards production of very long oligomers<sup>27,28</sup>. Recent advances in employing biocatalysts for *in vitro* cellulose synthesis include production of high molecular weight (DP > 200) cellulose or cellulose microfibrils from uridine diphosphate glucose (UDP-Glc) via exploitation of bacterial or plant-derived cellulose synthase (complexes) that are functionally reconstituted in lipid bilayers<sup>29,30</sup>. Native and derivatized cellulose and its oligosaccharides have been generated from glucose-1-phosphate and cellobiose via exploitation of the reversible reaction mechanism of cellodextrin phosphorylases<sup>31-35</sup>, whereby reaction conditions can direct the degree of polymerization of the obtained oligosaccharide mixtures<sup>36,37</sup>. However, irreversible mechanisms of biocatalytic synthesis of soluble cello-oligosaccharides would present an attractive alternative. While progress has been made via glycosyltransferases, which can generate  $\beta$ -1,4-linked glycosidic linkages using activated Glc- $\alpha$ -F as the donor<sup>38</sup>, it remains challenging to generate natural or derivatized soluble cello-oligosaccharides from natural donors due to a lack of suitable biocatalysts.

Glycosyltransferases synthesize highly regio- and stereospecific glycosidic bonds between glycan acceptors and naturally occurring activated sugar donors with phosphate leaving groups, such as phosphate bound-sugars (e.g. glucose-1-phosphate) or nucleotide-sugars (e.g. UDP-Glc)<sup>39-41</sup>. So far the enzymatic synthesis of Glc- $\beta$ -1,4-Glc linkages from nucleotide sugars has been restricted to plant and bacterial cellu-

lose synthases and formation of soluble cellulose oligosaccharides by these enzymes has not been reported. However, glycosyltransferases can be promiscuous in acceptor and donor substrates, thereby providing a rich source of biocatalysts with potentially exploitable side reactions. For example, human blood group galactosyltransferase and bovine  $\beta$ 4GalT1 have been reported to display activity with multiple UDP-donor substrates including UDP-Glc<sup>42-44</sup>, while *Neisseria meningitidis* LgtB displays activity towards multiple acceptor substrates<sup>45</sup>. The rates of activity on alternative acceptors and donors have in many cases been demonstrated to be sufficient for exploitation of the promiscuous activity in synthesis of glycosides<sup>42,44-48</sup>. In principle, a glycosyltransferase able to accommodate both UDP-Glc as donor and a Glc-terminated structure as acceptor could function as glucose polymerase (Fig. 1), whereby the degree of polymerization can potentially be tuned through optimization of reaction conditions or via enzyme engineering. Substrate promiscuity of glycosyltransferases is therefore a promising avenue to explore in a rational approach to identify a biocatalyst able to synthesize soluble cellulose oligosaccharides.

Here we describe how the rational exploration of galactosyltransferase substrate promiscuity resulted in the identification of a broad-specificity biocatalyst that functions as a glucose polymerase *in vitro*. We demonstrate how the enzyme can be applied to the practical synthesis of cellulose-oligosaccharides. Via polymerization onto imidazolium-tagged (ITag-) glycosides<sup>48,49</sup>, we generated cellulose-based probes for enzyme activity that are highly suitable for mass spectrometry-based detection. We demonstrate their utility in substrate-product profiling of hydrolytic and oxida-

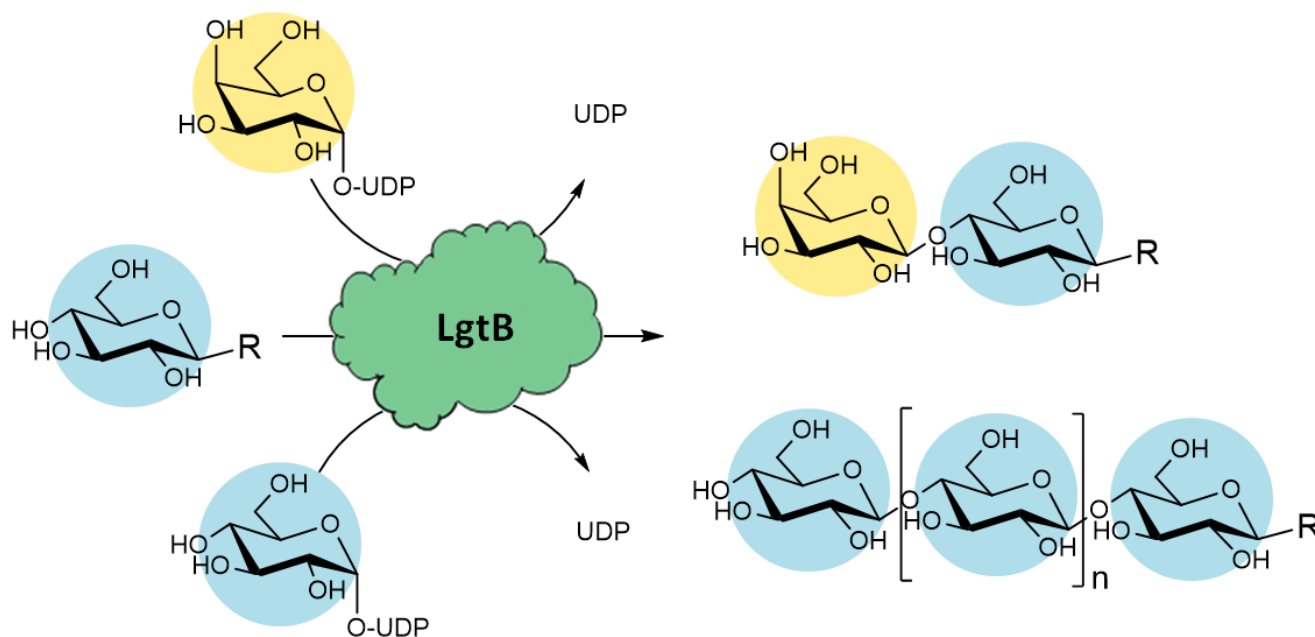

**Fig. 1 | Exploiting promiscuous activity to retask a galactosyltransferase for glucose polymerization.** In principle, a glycosyltransferase that accepts UDP-Glc as donor and Glc-terminated structures as acceptor substrate, enables glucose polymerization. Following this rationale, exploration of promiscuous galactosyltransferase activity resulted in identification of a biocatalyst, *Neisseria meningitidis* LgtB, suitable for generation of  $\beta$ -1,4-linked glucose oligosaccharides and their derivatives. This and following diagrams use symbol nomenclature for glycans (SNFG)<sup>52,53</sup>.

tive biomass degrading enzyme activities such as lytic polysaccharide monoxygenases (LPMOs) – enzymes of high importance to industrial biomass conversion for which assays reporting on selectivity are in demand<sup>50,51</sup>. Via incorporation of the polymerase in biocatalytic cascades we gained access to derivatized oligosaccharides with  $\beta$ -1,4-linked glucose motifs, and we demonstrate applicability of these as probes to detect selectivity of cellulolytic enzymes. We anticipate that the polymerase activity of this enzyme will find broad application in biocatalytic strategies to generate glycan structures and probes for glycobiology and wider areas of nanobiotechnology.

## Results

**A biocatalyst for glucose polymerization.** With the aim to identify a glycosyltransferase capable of generating  $\beta$ -1,4-linked glucose (Glc) oligosaccharides, we assembled a panel of five recombinantly expressed galactosyltransferases and screened it for promiscuous acceptance of Glc-based donor and acceptor substrates. Transfer of UDP-Glc to an acceptor with a terminal Glc-R motif would result in reaction products that can be re-used as an acceptor, thus enabling the desired Glc polymerization. As the acceptor structure can potentially affect the generated glycosidic linkage type<sup>54</sup>, enzymes

with a variety of reported specificities were included.

To monitor the activity of the enzyme panel, we employed a sensitive and fast assay based on glycosylation of sugar acceptors labelled with imidazolium-based probes (I-Tags), such as the 4-(1-methyl-3-methyleneimidazolium)benzyl carbamate  $\beta$ -glucoside<sup>48</sup> ITag-Glc-1 (**1**) (Fig. 2A). Our previous work demonstrated that such I-Tags generate strong signals in mass spectrometry that dominate the analyte ionization and can be employed for yield estimation in biotransformations<sup>48,55,56</sup>. To assess the scope of the glucose polymerization activity, we chemically synthesized the novel 4-(1-methyl-3-methyleneimidazolium) benzyl  $\beta$ -glucoside ITag-Glc-2 (**2**) (Fig. 2A) in 4 steps (Fig. S5) with a yield of 49%.

The transfer of galactose (Gal) from UDP-Gal to I-Tagged acceptors was detected as an activity displayed by all tested panel members, LgtB, LgtC, LgtH, B4GALT4 and G0PH97 (Fig. S1, S2). In contrast, activity with UDP-Glc was detected only for *Homo sapiens* B4GALT4 and *Neisseria meningitidis* LgtB, with multiple reaction products due to polymerization observed in the latter case. LgtB was therefore identified as the biocatalyst most suitable for our target activity, i.e. glucose polymerization.

After incubation of LgtB with **1** or **2** and an excess of UDP-Glc at 37°C, a range of I-Tagged glucose oligosaccharides with a degree of polymerization

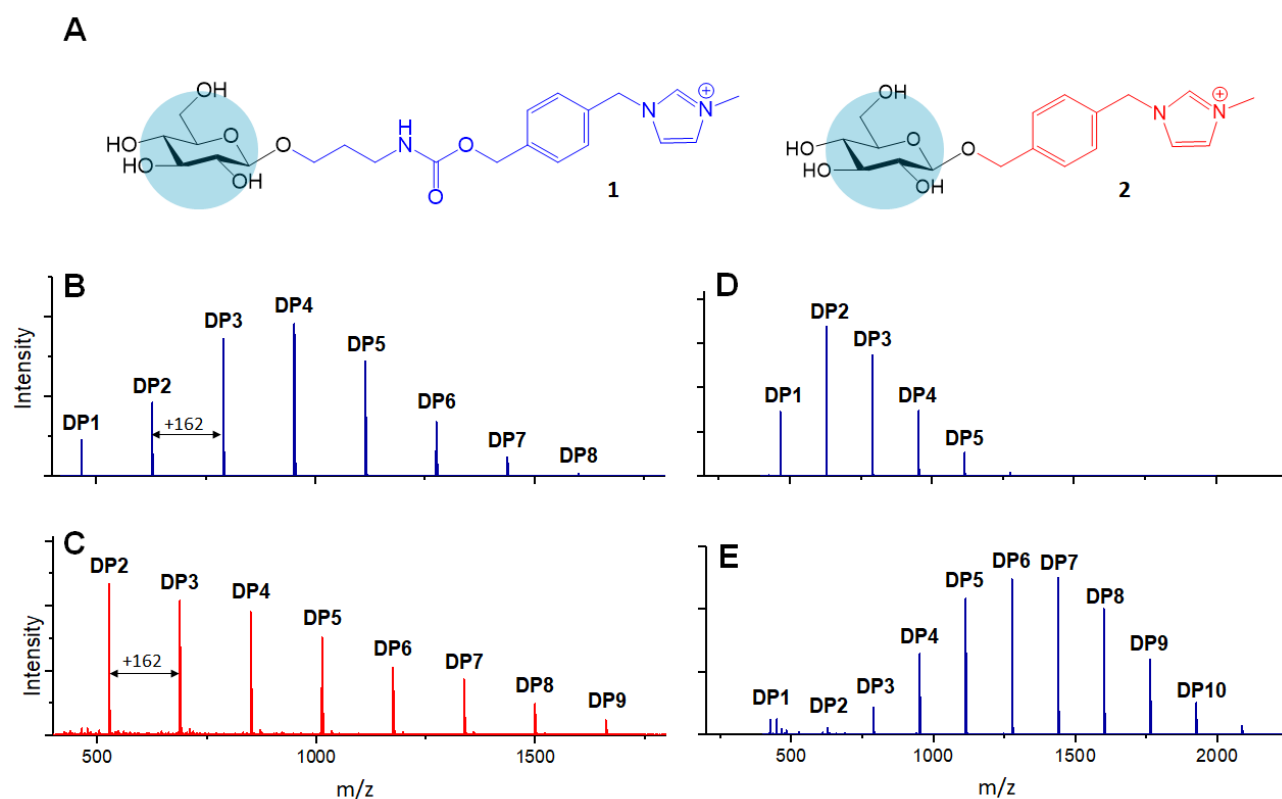

**Fig. 2| Cello-oligosaccharide envelopes as produced by LgtB via polymerization of glucose onto I-Tagged glucose acceptors.** A, acceptor substrates for LgtB, glucosides derivatized with I-Tag 1 (**1**) and I-Tag 2 (**2**). B, oligosaccharide envelopes as synthesized by LgtB onto acceptor **1** and detected by MALDI-TOF MS. C, oligosaccharide envelopes as synthesized by LgtB onto **2** as detected by MALDI-TOF MS. D, E length of incubation and UDP-Glc concentration alters length and ratio of oligosaccharides produced, shown after 2 days, 1.5 mM UDP-Glc and 7 days, 15 mM UDP-Glc respectively. Degrees of polymerization are indicated, masses are specified in supplementary information.

(DP) of up to 7 and 9, respectively (Fig. 2B, C) were observed. Adjustment of reaction conditions allowed us to direct the glucose polymerization towards a desired product range (Fig. S6). For example, extending incubation times and increasing donor concentrations resulted in oligosaccharides with higher DPs (Fig. 2D, E). Two-dimensional heteronuclear single quantum coherence NMR (2D HSQC NMR) analysis of purified I-Tag Glc oligosaccharides generated from (1) confirmed that the Glc residues were connected by  $\beta$ -1,4-glycosidic linkages (Fig. S7), demonstrating the strict selectivity in anomeric configuration and position of the glycoside linkage that is formed by LgtB.

The glucose polymerization reaction was not restricted to the ITag-Glc acceptors; LgtB was able to polymerise Glc onto a broad range of acceptor substrates (Table S1) including native cello-oligosaccharides and derivatives with reducing end conjugates such as Glc<sub>(n)</sub>-pNP (Fig. S4). This is in line with the reported broad acceptor substrate scope of this enzyme, which has been exploited for chemo-enzymatic synthesis of  $\beta$ -1,4-linked galactosides incorporating e.g. GlcNAc(-pNP), Man-pNP, Glc(-pNP) and various C2-derivatives<sup>45-48</sup>. No activity was found using Gal, xylose (Xyl), arabinose (Ara), lactose (Gal- $\beta$ -1,4-Glc) and trehalose (Glc- $\alpha$ -1,1-Glc) as acceptors. Acceptor substrates thus require an equatorial configuration of the C4 -OH group and the

presence of a C6 -OH group while both the C1 and C2 substitutions are highly flexible. Further examining the donor scope of LgtB, transfer of Xyl and GalNAc but not GlcNAc from their respective UDP-conjugates to acceptors was also detected, although with lower yields (Fig. S3).

The discovery of the extended biosynthetic scope of LgtB opens up the possibility of including cello-oligosaccharide biosynthesis in biocatalytic cascades, such as those enabling regeneration of UDP-glucose. We demonstrated this principle by combining LgtB in a one pot, two enzyme cascade (Fig. 3) with *Solanum lycopersicum* sucrose synthase (SLSUS6), hereafter SuSy. In the presence of UDP, SuSy converts relatively inexpensive sucrose into fructose and UDP-Glc<sup>57</sup>, this biocatalyst is therefore widely employed for the synthesis of nucleotide sugars and glucosides<sup>58,59</sup>. Combining SuSy in incubations with LgtB and acceptor substrates 1 or 2 resulted in the formation of I-Tagged cello-oligosaccharides (Fig. S8) with DP ranges and ratios similar to those observed in LgtB reactions using UDP-Glc directly as donor substrate. These results demonstrate how UDP-Glc generated via SuSy activity from sucrose, can be used as a donor substrate by LgtB, resulting in a successful integration of both enzymes in a one-pot biocatalytic cascade that converts sucrose to I-Tagged cello-oligosaccharides, and points to the po-

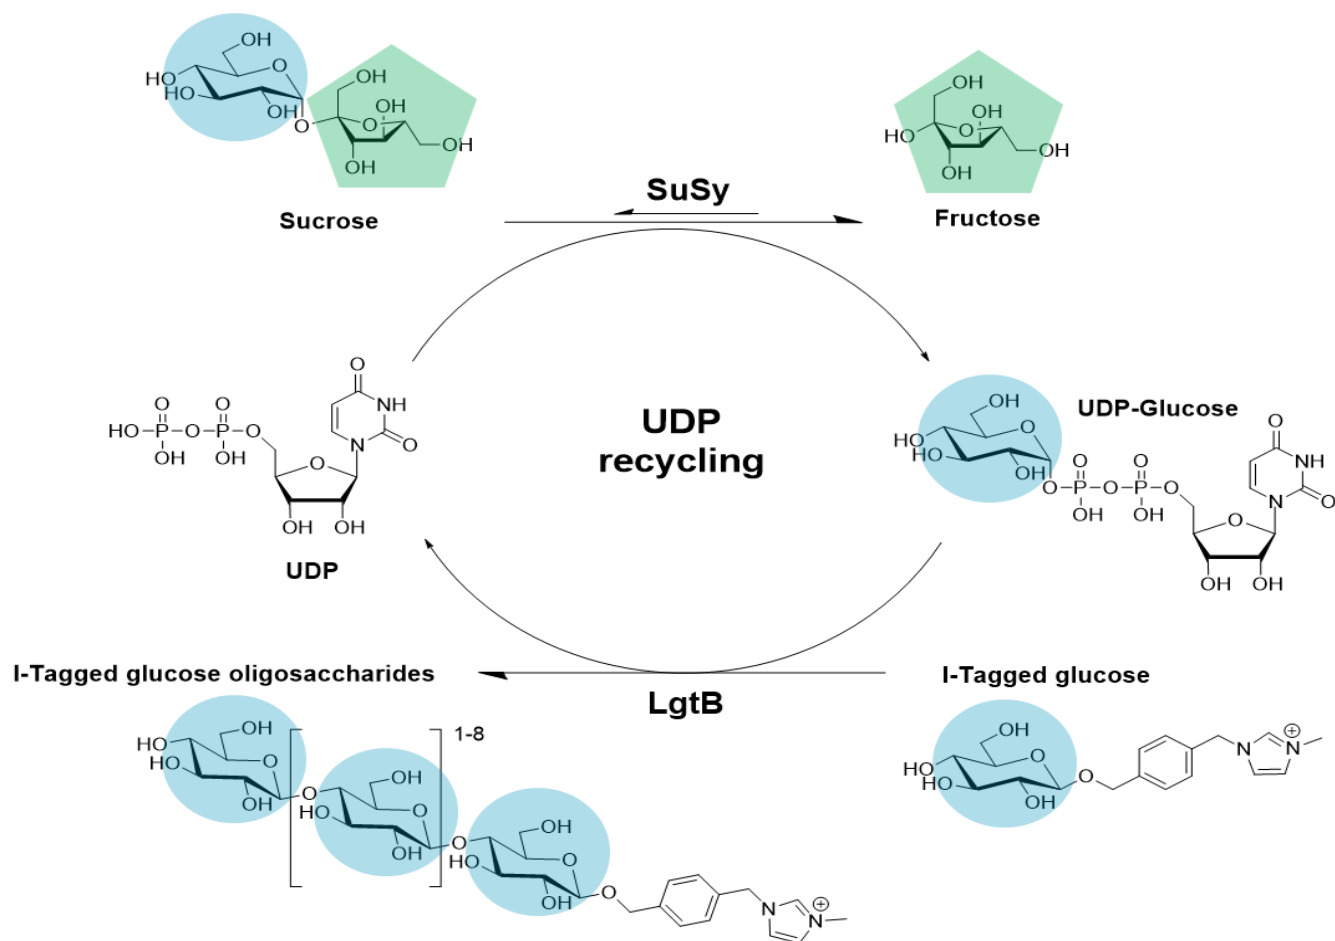

**Fig. 3 | Biocatalytic cascade enabling effective coupling of UDP-glucose regeneration with glucose polymerization.** LgtB and sucrose synthase (SuSy) were utilised in a one-pot reaction for the production of I-Tagged cello-oligosaccharides.

lymerization of glucose from cheap sucrose starting materials.

Taken together, LgtB was identified as a promiscuous biocatalyst with glucose polymerase activity that can be exploited for facile polymerization of glucose onto a broad range of acceptors, resulting in native and derivatized cello-oligosaccharides that are highly relevant in the development of materials or probes for cellulolytic enzymes.

### Exploiting LgtB to synthesize probes for LPMO activity profiling.

We exploited I-Tagged glucose oligosaccharides, generated via LgtB activity, to rapidly profile the catalytic activity and substrate preferences of lytic polysaccharide monoxygenases (LPMOs), a family of copper dependent enzymes that oxidatively degrade recalcitrant polysaccharides such as cellulose, chitin and starch<sup>60-63</sup>. LPMOs utilize molecular oxygen or hydrogen perox-

ide to insert a single oxygen atom into the C1-H and/or C4-H bond of saccharide substrates<sup>61,64,65</sup> generating lactone or 4-ketoaldose products that can spontaneously convert to aldonic acids or 4-gemdiol-aldoses, respectively (Fig. 4A). LPMOs have attracted considerable commercial interest as auxiliary enzymes for the cost-effective production of biofuels from lignocellulosic feedstocks, and also hold great promise for the selective functionalization of carbohydrates for the development of (ligno)cellulose-based chemicals and materials. As such, there is great interest in developing sensitive high-throughput assays that report on LPMO selectivity for C1- vs C4- oxidation, and allow identification of enzymes with activity on soluble low- to medium- molecular weight oligomers. This can in principle be achieved by employing I-Tagged probes in LPMO activity assays, followed by mass spectrometry-based detection of reaction products. The cationic nature of I-Tagged probes avoids formation of sodium or potassium adducts<sup>48</sup> that

**A**

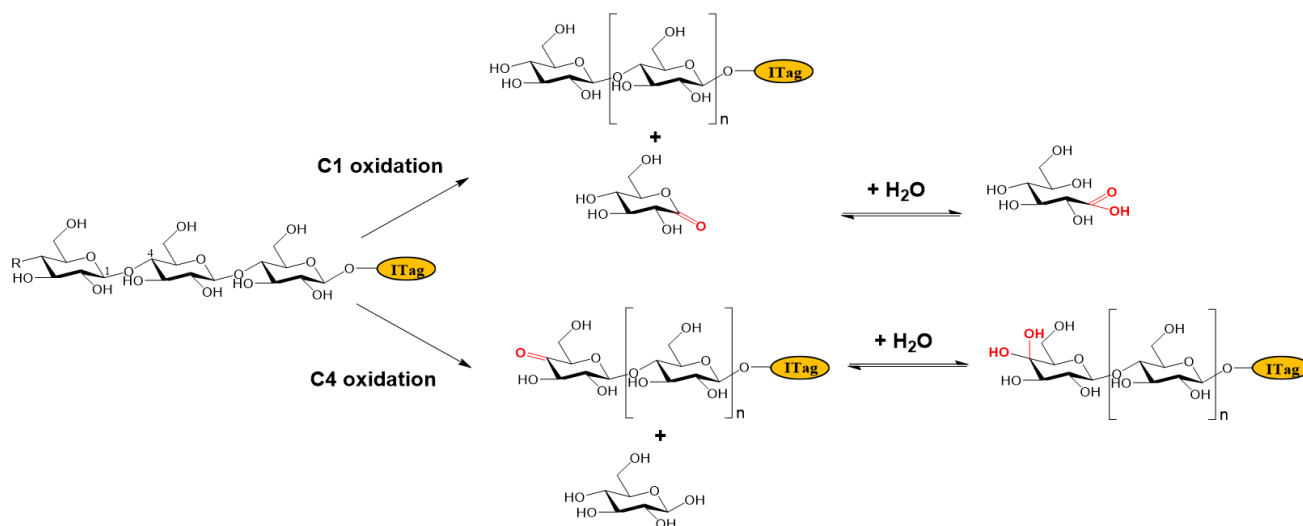

**B**

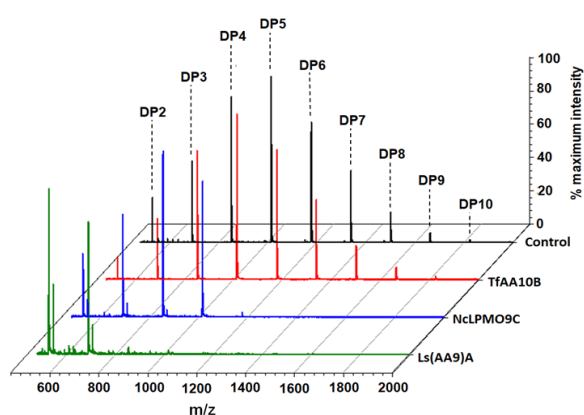

**C**

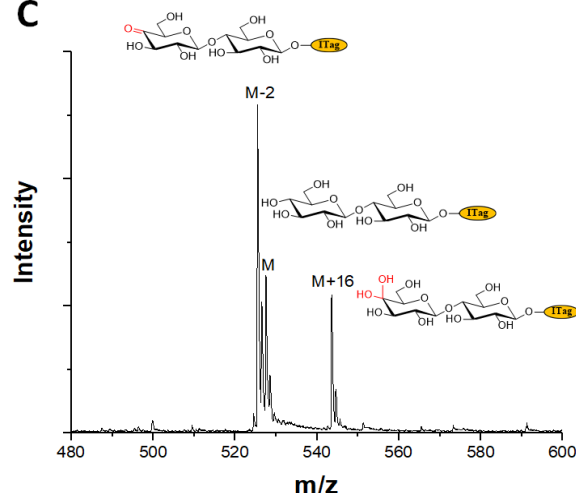

**Fig. 4 | I-Tagged cello-oligosaccharides as informative probes for LPMO activity.** **A**, the C1- and C4-oxidative activity of LPMO on I-Tagged oligosaccharides results in distinctive reaction products that can be easily identified by MALDI-TOF MS. **B**, diagram demonstrating selective activity on I-Tagged glucose oligosaccharide substrates by a panel of LPMOs. **C**, the products of NcLPMO9C activity on I-Tagged cello-oligosaccharides include those with a mass corresponding to C4-ketone (M-2) and gemdiol (M+16) disaccharides, confirming C4-oxidative activity.

have been demonstrated to complicate mass spectrum interpretation in LPMO activity assays<sup>66</sup>.

A small panel of LPMOs was produced in *E. coli* as the expression host; *Aspergillus oryzae* LPMO of CAZy family AA11 Ao(AA11)<sup>60</sup>, *Lentinus similis* Ls(AA9)A<sup>61,65</sup>, *Neurospora crassa* NcLPMO9C<sup>51,62,67</sup> and *Thermobifida fusca* Tf(AA10)B<sup>68</sup> (see SI for detailed protocols and accession numbers). Biotransformations were performed with purified enzymes, using an envelope of I-Tagged glucose oligosaccharides (DP 1-10) in the presence of H<sub>2</sub>O<sub>2</sub> and ascorbate as a reducing agent. The distribution of labelled oligosaccharides was unchanged following incubation with either Tf(AA10)B or Ao(AA11) (Fig. 4B, S9), demonstrating that these enzymes are not active towards the oxidation of soluble cello-oligosaccharides with DP < 10. In contrast, reactions with Nc(AA9)C and Ls(AA9)A led to complete consumption of oligosaccharides with DP ≥ 6 and 4, respectively (Fig. 4B), with concomitant formation of labelled C4-oxidized products (DP 2-4 and DP 2-3, respectively) with molecular weights of [M-2] (C4-ketone) and [M+16] (C4-gemdiol) (where M is the molecular weight of the corresponding non-oxidized labelled carbohydrate) (Fig. 4C). These combined data are consistent with the previously reported substrate profiles of Tf(AA10)B, Ao(AA11), Nc(AA9)C and Ls(AA9)A, and highlight the utility of I-Tagged glucose oligosaccharides envelopes for rapidly profiling LPMO activity.

### Facile chemo-enzymatic synthesis of probe derivatives and their application.

To further explore the application of I-Tagged cello-oligosaccharides as enzyme activity probes, we initially verified activity of a commercially obtained β-glucosidase from Almond and of a mixture of cellulases from *Aspergillus niger* on the probes (Fig. 5A-C). The β-glucosidase has been reported to cleave glucose residues from di- and oligosaccharides in an exo-acting fashion whereas the cellulases function mainly in an endo-acting manner<sup>69</sup>. After 1 h incubation with β-glucosidase at 37 °C, analysis of reaction products via MALDI-TOF MS resulted in detection of only a single peak of *m/z* 466, indicating that as expected the enzyme hydrolyzed high-DP oligosaccharides, leaving only a single Glc residue attached to the ITag (Fig. 5C). A 2 h incubation with the cellulases resulted in a similar product (Fig. 5B), whereas no changes were detected after incubation with a negative control containing only buffer. These results confirm that the enzymatically synthesized I-Tagged cello-oligosaccharides are suitable probes to detect glycoside hydrolase activity.

Selective detection of endo-cellulase activity is in principle enabled by generating an enzyme substrate that cannot be hydrolysed via hydrolysis of its termini. Following this principle, progress has been made in generating ‘blocked’ substrates for endo-cellulases and endo-xylanases that are compatible with colorimetric assays (e.g. detection of released 2-chloro-4-ni-

trophenol)<sup>70,71</sup>. Here we expand the range of ‘blocked’ substrates to probes that are compatible with fast and sensitive detection of activity via MALDI-TOF MS. We demonstrate how LgtB can effectively be incorporated in chemo-enzymatic strategies to derivatize or tailor cellulose structures, opening up access to chemical building blocks or tailored enzyme probes.

‘Blocked’ I-Tagged glucose oligosaccharides were generated via a chemo-enzymatic approach based on creation of a bio-orthogonal aldehyde on the non-reducing termini of oligosaccharides, which is subsequently derivatized with a nicotinic hydrazide group (Fig. 5D). Enzymatic oxidation of UDP-Gal to UDP-Gal<sub>ox</sub> was achieved using *F. graminearum* galactose oxidase (GOase) variant M<sub>1</sub><sup>72</sup>, reaching full conversion after overnight incubation at 25 °C (Fig. S10). I-Tagged oligosaccharides were generated with LgtB, purified (Fig. 5E), and the UDP-Gal<sub>ox</sub> was subsequently transferred onto their non-reducing termini via overnight incubation with LgtB. The introduction of this bio-orthogonal aldehyde enables selective derivatization of the terminal Gal moieties via previously described methodologies<sup>73,74</sup>. Here, nicotinic hydrazide was ligated with the C6-Gal aldehyde to generate ‘blocked’ oligosaccharides (Fig. 5F). To demonstrate the necessity of the I-Tag at the reducing end, the same derivatization strategy was applied to celohexaose. Incubation of the Gal<sub>ox</sub> containing celohexaose with nicotinic hydrazide generated a double ligated species with the nicotinic hydrazide ligating at the aldehyde of the Gal<sub>ox</sub> as well as the aldehyde at the free reducing end. This generated a particularly complex mixture, with which it would prove difficult to assess the effectiveness of hydrolases (Fig. S11).

With the blocked substrates in hand, we confirmed protection of the substrates against exo-acting enzyme activity via incubations of this envelope of probes and intermediate products with exo-acting enzymes. The addition of a terminal galactose was sufficient to protect the cello-oligosaccharides oligosaccharides against β-glucosidase activity, while the derivatization with the hydrazide group was required and sufficient to protect structures against β-galactosidases from a range of glycoside hydrolase families (GH1, GH42 and GH50) (Fig. 5G, Fig. S12). Finally, we employed the blocked substrates to monitor endo-acting cellulases for activity, and validated the presence of cellulolytic activity by MALDI-TOF MS (Fig. 5H). The endo-cellulase reaction product profile was similar to those of the same enzymes incubated with I-Tagged oligosaccharides with a free non-reducing end. Taken together, we have developed a probe for the selective detection and profiling of endo-cellulase activity via MALDI-TOF MS, demonstrating how LgtB mediated synthesis of cello-oligosaccharides can be successfully incorporated into chemo-enzymatic derivatization strategies.

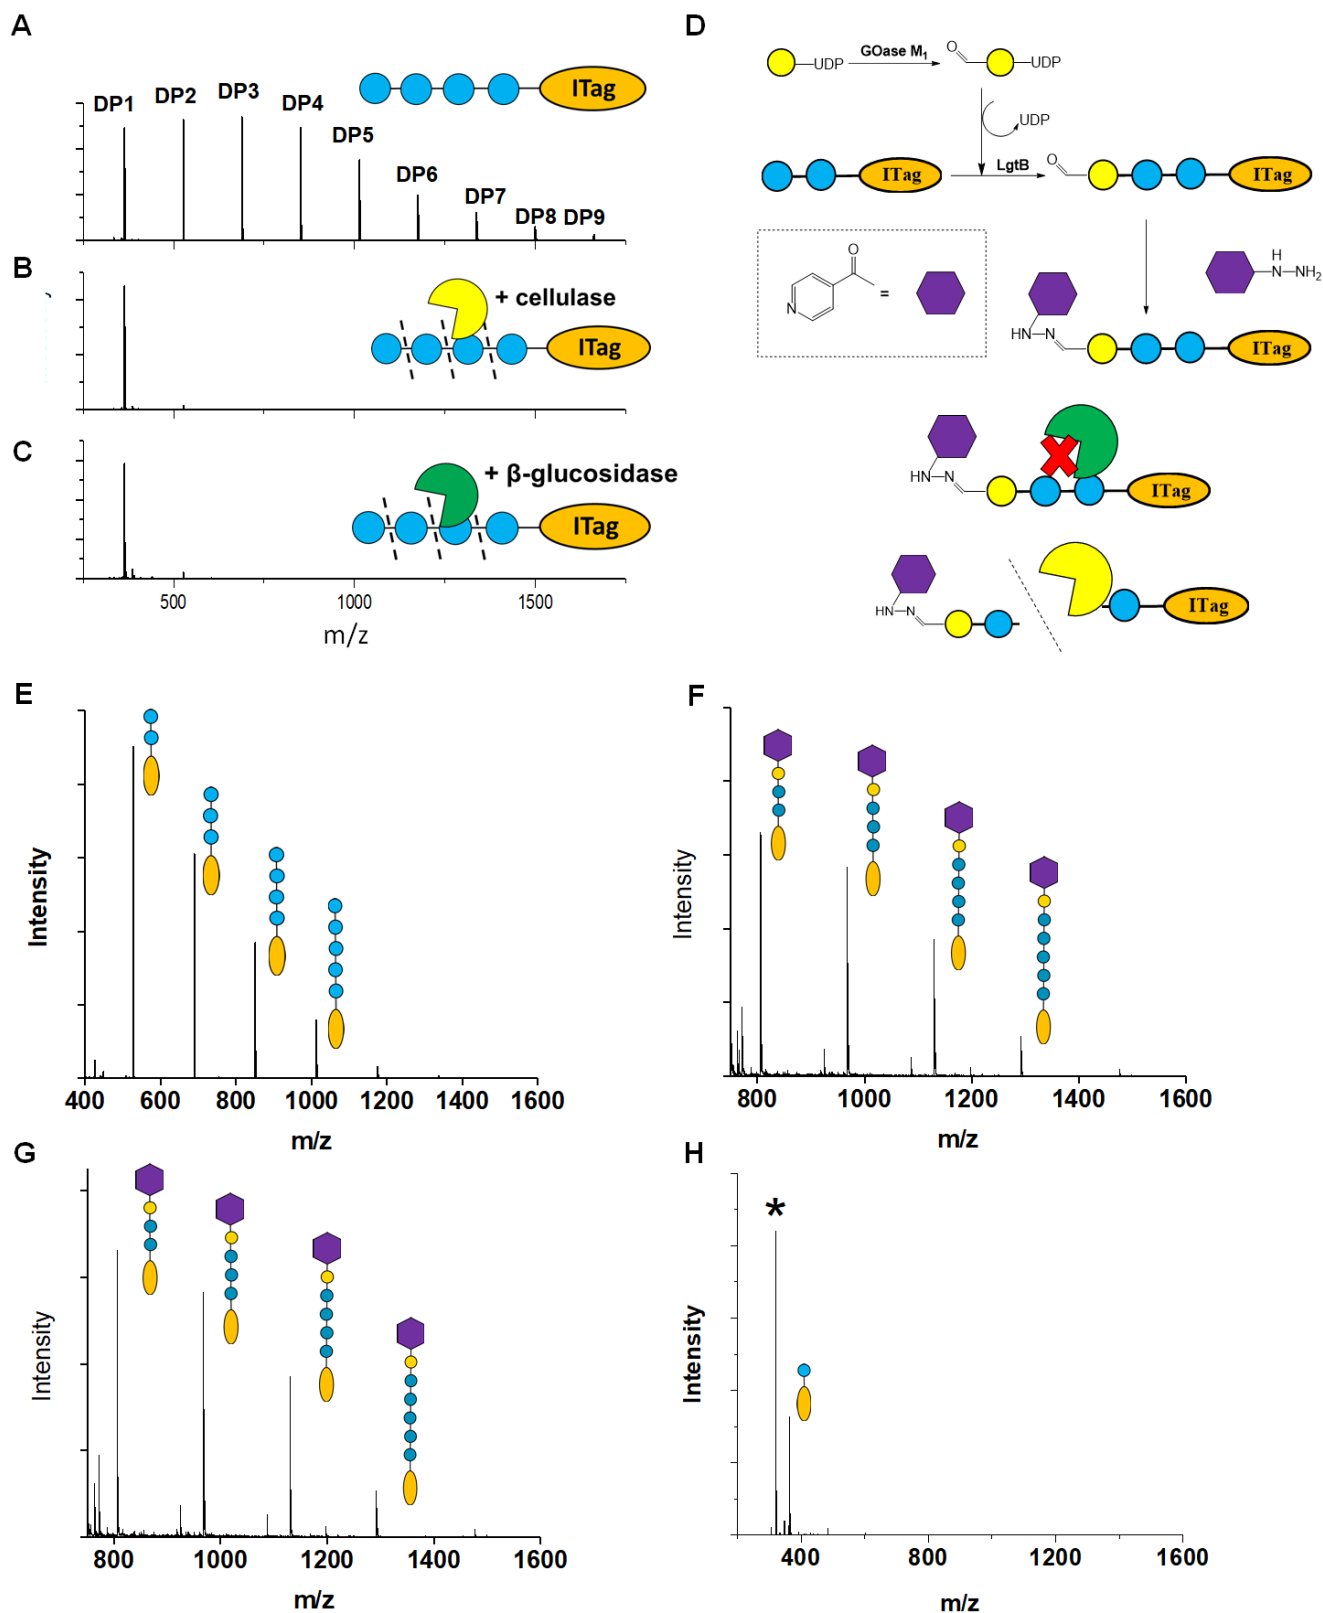

**Fig. 5] Chemo-enzymatic derivatization of cello-oligosaccharides to selective endo-cellulase substrates.** **A**, Representative MALDI-TOF MS spectra demonstrating I-Tagged cello-oligosaccharides after incubation without any cellulolytic enzyme **B**, with *A. niger* cellulase and **C**, with  $\beta$ -glucosidase from almond. **D**, derivatization strategy employed to protect LgtB product termini against hydrolytic activity; **E**, MALDI-TOF MS spectra of the envelope of purified I-Tagged cello-oligosaccharides; **F**, probe envelope obtained after ligation to oxidised galactose and nicotinic hydrazide; **G**, probe envelope after incubation with  $\beta$ -glucosidase and  $\beta$ -galactosidase; **H**, probe envelope after incubation with *A. niger* cellulases. Asterix indicates a product corresponding to a glycosylated hydrazide.

## Conclusion

We have demonstrated that glycosyltransferase LgtB has a broad substrate scope that includes polymerase activity using UDP-Glc as donor and Glc-terminated glycosides as acceptors. This promiscuous activity can be exploited to polymerize glucose via  $\beta$ -1,4-glycosidic linkages. Synthesis of such cello-oligosaccharides onto acceptors derivatized on the reducing termini with a variety of chemical handles resulted in functionalized oligosaccharides. As the LgtB enzyme can be obtained via facile heterologous expression in *E. coli*, these findings enable straightforward synthesis of enzyme probes and generate new strategies for (chemo)enzymatic synthesis of cello-oligosaccharide derivatives. As proof-of-principle we exploited LgtB to generate I-Tagged cello-oligosaccharides, which were employed in a sensitive and robust MALDI-TOF MS-based assay to report on substrate use of cellulolytic enzymes. In addition to detecting enzyme activity and enabling profiling of substrate specificity, the probes allow facile and reliable discrimination between products from LPMO's C1 and C4 oxidation reactions. The resulting semi-high throughput profiling of LPMO activity in combination with the facile bacterial LPMO expression system opens up the exciting possibility of LPMO enzyme engineering. The incorporation of LgtB catalytic activity in a broader chemo-enzymatic strategy to derivatize or tailor cello-oligosaccharides has the potential to open up access to chemical building blocks or tailored enzyme probes. We demonstrated this via the generation of probes to selectively detect endo-acting cellulolytic enzyme activities, achieved via chemo-enzymatic derivatization of the non-reducing cello-oligosaccharide termini to protect them against hydrolysis.

## Acknowledgements

This study was funded by the BBSRC, EPSRC and InnovateUK: IBCatalyst programme via BB/P011462/1 (JvM), DTP EP/N509565/1 (JvM), BB/M027023/1 (APG), BB/M029034/1 (SLF), BB/L013762/1 (SLF), BB/M028836/1 (SLF), BB/M027791/1 (SLF), the Marie Skłodowska-Curie Innovative Training Network (H2020-MSCA-ITN-2014-ETN-642870), European Union (CarboMet 737395), and the European Research Council (ERC) Starter Grant 757991 (APG), CoG 648239 (MCG), BB/M028976/1 (MCG), 788231-ProgrES-ERC-2017-ADG (SLF). We are grateful for the help provided by Dr Matthew Cliff for NMR analysis.

## References

1. Tuck, C. O., Pérez, E., Horváth, I. T., Sheldon, R. A. & Poliakoff, M. Valorization of biomass: Deriving more value from waste. *Science*. **337**, 695–699 (2012).
2. Ragauskas, A. J. *et al.* The path forward for biofuels and biomaterials. *Science*. **311**, 484–489 (2006).
3. Himmel, M. E. *et al.* Biomass recalcitrance: Engineering plants and enzymes for biofuels production. *Science*. **315**, 804–807 (2007).
4. Ragauskas, A. J. *et al.* Lignin valorization: Improving lignin processing in the biorefinery. *Science*. **344**, (2014).
5. Couturier, M. *et al.* Lytic xylan oxidases from wood-decay fungi unlock biomass degradation. *Nat. Chem. Biol.* **14**, 306–310 (2018).
6. Chylenski, P. *et al.* Lytic Polysaccharide Monooxygenases in Enzymatic Processing of Lignocellulosic Biomass. *ACS Catal.* **9**, 4970–4991 (2019).
7. Uyeno, Y., Shigemori, S. & Shimosato, T. Effect of probiotics/prebiotics on cattle health and productivity. *Microbes Environ.* **30**, 126–132 (2015).
8. Flint, H. J., Bayer, E. A., Rincon, M. T., Lamed, R. & White, B. A. Polysaccharide utilization by gut bacteria: Potential for new insights from genomic analysis. *Nat. Rev. Microbiol.* **6**, 121–131 (2008).
9. Younes, M. *et al.* Re-evaluation of celluloses E 460(i), E 460(ii), E 461, E 462, E 463, E 464, E 465, E 466, E 468 and E 469 as food additives. *EFSA J.* **16**, (2018).
10. Mérida, H., Sandoval-Sierra, J. V., Diéguez-Urbeondo, J. & Bulone, V. Analyses of extracellular carbohydrates in oomycetes unveil the existence of three different cell wall types. *Eukaryot. Cell.* **12**, 194–203 (2013).
11. Picard, K., Tirilly, Y. & Benhamou, N. Cytological effects of cellulases in the parasitism of *Phytophthora parasitica* by *Pythium oligandrum*. *Appl. Environ. Microbiol.* **66**, 4305–4314 (2000).
12. Grenville-Briggs, L. J. *et al.* Cellulose Synthesis in *Phytophthora infestans* Is Required for Normal Appressorium Formation and Successful Infection of Potato. *Plant Cell.* **20**, 720–738 (2008).
13. Antypas, H., Choong, F. X., Libberton, B., Brauner, A. & Richter-Dahlfors, A. Rapid diagnostic assay for detection of cellulose in urine as biomarker for biofilm-related urinary tract infections. *npj Biofilms Microbiomes.* **4**, (2018).
14. Anderson, G. G. & O'Toole, G. A. Innate and induced resistance mechanisms of bacterial biofilms. *Curr. Top. Microbiol. Immunol.* **322**, 85–105 (2008).
15. Trivedi, A., Mavi, P. S., Bhatt, D. & Kumar, A. Thiol reductive stress induces cellulose-anchored biofilm formation in *Mycobacterium tuberculosis*. *Nat. Commun.* **7**, (2016).
16. Zogaj, X., Nimtz, M., Rohde, M., Bokranz, W. & Römling, U. The multicellular morphotypes of *Salmonella typhimurium* and *Escherichia coli* produce cellulose as the second component of the extracellular matrix. *Mol. Microbiol.* **39**, 1452–1463 (2001).



17. Thongsomboon, W. *et al.* Phosphoethanolamine cellulose: A naturally produced chemically modified cellulose. *Science*. **359**, 334–338 (2018).
18. Van Wyk, N. *et al.* Characterization of a mycobacterial cellulase and its impact on biofilm- and drug-induced cellulose production. *Glycobiology*. **27**, 392–399 (2017).
19. Koo, H., Allan, R. N., Howlin, R. P., Stoodley, P. & Hall-Stoodley, L. Targeting microbial biofilms: Current and prospective therapeutic strategies. *Nat. Rev. Microbiol.* **15**, 740–755 (2017).
20. Klemm, D., Heublein, B., Fink, H. P. & Bohn, A. Cellulose: Fascinating biopolymer and sustainable raw material. *Angew. Chem.* **44**, 3358–3393 (2005).
21. De France, K. J., Hoare, T. & Cranston, E. D. Review of Hydrogels and Aerogels Containing Nanocellulose. *Chem. Mater.* **29**, 4609–4631 (2017).
22. Shen, X., Shamshina, J. L., Berton, P., Gurau, G. & Rogers, R. D. Hydrogels based on cellulose and chitin: Fabrication, properties, and applications. *Green. Chem.* **18**, 53–75 (2015).
23. Moon, R. J., Martini, A., Nairn, J., Simonsen, J. & Youngblood, J. Cellulose nanomaterials review: Structure, properties and nanocomposites. *Chem. Soc. Rev.* **40**, 3941–3994 (2011).
24. Delbianco, M. *et al.* Well-Defined Oligo- and Polysaccharides as Ideal Probes for Structural Studies. *J. Am. Chem. Soc.* **140**, 5421–5426 (2018).
25. Pardo-Vargas, A., Delbianco, M. & Seeberger, P. H. Automated glycan assembly as an enabling technology. *Current Opinion in Chemical Biology* **46**, 48–55 (2018).
26. Kumar, M., Campbell, L. & Turner, S. Secondary cell walls: Biosynthesis and manipulation. *J. Exp. Bot.* **67**, 515–531 (2016).
27. Papaspyridi, L. M., Zerva, A. & Topakas, E. Biocatalytic synthesis of fungal  $\beta$ -glucans. *Catalysts* **8**, (2018).
28. Yakovlieva, L. & Walvoort, M. T. C. Processivity in Bacterial Glycosyltransferases. *ACS Chem. Biol.* **15**, 3–15 (2019).
29. Omadjela, O. *et al.* BcsA and BcsB form the catalytically active core of bacterial cellulose synthase sufficient for in vitro cellulose synthesis. *Proc. Natl. Acad. Sci.* **110**, 17856–17861 (2013).
30. Purushotham, P. *et al.* A single heterologously expressed plant cellulose synthase isoform is sufficient for cellulose microfibril formation in vitro. *Proc. Natl. Acad. Sci.* **113**, 11360–11365 (2016).
31. Nakai, H., Kitaoka, M., Svensson, B. & Ohtsubo, K. Recent development of phosphorylases possessing large potential for oligosaccharide synthesis. *Curr. Opin. Chem. Biol.* **17**, 301–309 (2013).
32. O'Neill, E. C. *et al.* Cellodextrin phosphorylase from *Ruminiclostridium thermocellum*: X-ray crystal structure and substrate specificity analysis. *Carbohydr. Res.* **451**, 118–132 (2017).
33. Adharis, A., Petrović, D. M., Özdamar, I., Woortman, A. J. J. & Loos, K. Environmentally friendly pathways towards the synthesis of vinyl-based oligocelluloses. *Carbohydr. Polym.* **193**, 196–204 (2018).
34. Tran, H. G. *et al.* Biocatalytic production of novel glycolipids with cellodextrin phosphorylase. *Bioresour. Technol.* **115**, 84–87 (2012).
35. Yataka, Y., Sawada, T. & Serizawa, T. Enzymatic synthesis and post-functionalization of two-dimensional crystalline cellulose oligomers with surface-reactive groups. *Chem. Commun.* **51**, 12525–12528 (2015).
36. Petrović, D. M., Kok, I., Woortman, A. J. J., Ćirić, J. & Loos, K. Characterization of Oligocellulose Synthesized by Reverse Phosphorolysis Using Different Cellodextrin Phosphorylases. *Anal. Chem.* **87**, 9639–9646 (2015).
37. Zhong, C., Luley-Goedl, C. & Nidetzky, B. Product solubility control in cellooligosaccharide production by coupled cellobiose and cellodextrin phosphorylase. *Biotechnol. Bioeng.* **116**, 2146–2155 (2019).
38. Mackenzie, L. F., Wang, Q., Warren, R. A. J. & Withers, S. G. Glycosynthases: Mutant glycosidases for oligosaccharide synthesis. *J. Am. Chem. Soc.* **120**, 5583–5584 (1998).
39. Lairson, L. L., Henrissat, B., Davies, G. J. & Withers, S. G. Glycosyltransferases: Structures, Functions, and Mechanisms. *Annu. Rev. Biochem.* **77**, 521–555 (2008).
40. Yuan, Y. *et al.* Crystal structure of a peptidoglycan glycosyltransferase suggests a model for processive glycan chain synthesis. *Proc. Natl. Acad. Sci. U. S. A.* **104**, 5348–5353 (2007).
41. Liang, D.-M. *et al.* Glycosyltransferases: mechanisms and applications in natural product development. *Chem. Soc. Rev.* **44**, 8350–8374 (2015).
42. Palcic, M. M. & Hindsgaul, O. Flexibility in the donor substrate specificity of  $\beta$  1,4-galactosyltransferase: application in the synthesis of complex carbohydrates. *Glycobiology* **1**, 205–209 (1991).
43. McArthur, J. B. & Chen, X. Glycosyltransferase engineering for carbohydrate synthesis. *Biochem. Soc. Trans.* **44**, 129–42 (2016).
44. Seto, N. O. L., Compston, C. A., Szpacenko, A. & Palcic, M. M. Enzymatic synthesis of blood group A and B trisaccharide analogues. *Carbohydr. Res.* **324**, 161–169 (2000).
45. Lau, K. *et al.* Highly efficient chemoenzymatic synthesis of  $\beta$ 1-4-linked galactosides with promiscuous bacterial  $\beta$ 1-4-galactosyltransferases. *Chem. Commun.* **46**, 6066–6068 (2010).
46. Namdjou, D. *et al.* A  $\beta$ -1,4-Galactosyltransferase from *Helicobacter pylori* is an Efficient and Versatile Biocatalyst Displaying a Novel Activity for Thioglycoside Synthesis. *ChemBioChem.* **9**, 1632–1640 (2008).
47. Blixt, O., Brown, J., Schur, M. J., Wakarchuk, W. & Paulson, J. C. Efficient preparation of natu-

- ral and synthetic galactosides with a recombinant beta-1,4-galactosyltransferase-/UDP-4'-gal epimerase fusion protein. *J. Org. Chem.* **66**, 2442–8 (2001).
48. Huang, K. *et al.* Enzymatic synthesis of N-acetyl-lactosamine from lactose enabled by recombinant  $\beta$ 1,4-galactosyltransferases. *Org. Biomol. Chem.* **17**, 5920–5924 (2019).
  49. Sittel, I. & Galan, M. C. Imidazolium-labeled glycosides as probes to harness glycosyltransferase activity in human breast milk. *Org. Biomol. Chem.* **15**, 3575–3579 (2017).
  50. Horn, S. J., Vaaje-Kolstad, G., Westereng, B. & Eijsink, V. G. H. Novel enzymes for the degradation of cellulose. *Biotechnol. Biofuels* **5**, (2012).
  51. Isaksen, T. *et al.* A C4-oxidizing lytic polysaccharide monooxygenase cleaving both cellulose and cello-oligosaccharides. *J. Biol. Chem.* **289**, 2632–2642 (2014).
  52. Varki, A. *et al.* Symbol nomenclature for graphical representations of glycans. *Glycobiology* **25**, 1323–1324 (2015).
  53. Neelamegham, S. *et al.* Updates to the Symbol Nomenclature for Glycans guidelines. *Glycobiology* **29**, 620–624 (2019).
  54. Lairson, L. L., Watts, A. G., Wakarchuk, W. W. & Withers, S. G. Using substrate engineering to harness enzymatic promiscuity and expand biological catalysis. *Nat. Chem. Biol.* **2**, 724–728 (2006).
  55. Galan, M. C., Tran, A. T. & Bernard, C. Ionic-liquid-based catch and release mass spectroscopy tags for enzyme monitoring. *Chem. Commun.* **46**, 8968–8970 (2010).
  56. Tran, A. T., Burden, R., Racys, D. T. & Carmen Galan, M. Ionic catch and release oligosaccharide synthesis (ICROS). *Chem. Commun.* **47**, 4526–4528 (2011).
  57. Bieniawska, Z. *et al.* Analysis of the sucrose synthase gene family in Arabidopsis. *Plant J.* **49**, 810–828 (2007).
  58. Schmölder, K., Gutmann, A., Diricks, M., Desmet, T. & Nidetzky, B. Sucrose synthase: A unique glycosyltransferase for biocatalytic glycosylation process development. *Biotechnology Advances* **34**, 88–111 (2016).
  59. Chen, X. *et al.* Sugar nucleotide regeneration beads (superbeads): A versatile tool for the practical synthesis of oligosaccharides [12]. *Journal of the American Chemical Society* **123**, 2081–2082 (2001).
  60. Hemsworth, G. R., Henrissat, B., Davies, G. J. & Walton, P. H. Discovery and characterization of a new family of lytic polysaccharide monooxygenases. *Nat. Chem. Biol.* **10**, 122–126 (2014).
  61. Frandsen, K. E. H. *et al.* The molecular basis of polysaccharide cleavage by lytic polysaccharide monooxygenases. *Nat. Chem. Biol.* **12**, 298–303 (2016).
  62. Borisova, A. S. *et al.* Structural and functional characterization of a lytic polysaccharide monooxygenase with broad substrate specificity. *J. Biol. Chem.* **290**, 22955–22969 (2015).
  63. Frommhagen, M., Westphal, A. H., van Berkel, W. J. H. & Kabel, M. A. Distinct Substrate Specificities and Electron-Donating Systems of Fungal Lytic Polysaccharide Monooxygenases. *Front. Microbiol.* **9**, 1080 (2018).
  64. Tandrup, T., Frandsen, K. E. H., Johansen, K. S., Berrin, J.-G. & Lo Leggio, L. Recent insights into lytic polysaccharide monooxygenases (LPMOs). *Biochem. Soc. Trans.* **46**, 1431–1447 (2018).
  65. Simmons, T. J. *et al.* Structural and electronic determinants of lytic polysaccharide monooxygenase reactivity on polysaccharide substrates. *Nat. Commun.* **8**, (2017).
  66. Eijsink, V. G. H. *et al.* On the functional characterization of lytic polysaccharide monooxygenases (LPMOs). *Biotechnol. Biofuels* **12**, (2019).
  67. Agger, J. W. *et al.* Discovery of LPMO activity on hemicelluloses shows the importance of oxidative processes in plant cell wall degradation. *Proc. Natl. Acad. Sci. U. S. A.* **111**, 6287–6292 (2014).
  68. Forsberg, Z. *et al.* Comparative study of two chitin-active and two cellulose-active AA10-type lytic polysaccharide monooxygenases. *Biochemistry* **53**, 1647–1656 (2014).
  69. Kubicek, C. P., Starr, T. L. & Glass, N. L. Plant Cell Wall-Degrading Enzymes and Their Secretion in Plant-Pathogenic Fungi. *Annu. Rev. Phytopathol.* **52**, 427–451 (2014).
  70. McCleary, B. V. *et al.* Novel substrates for the measurement of endo-1,4- $\beta$ -glucanase (endo-cellulase). *Carbohydr. Res.* **385**, 9–17 (2014).
  71. Mangan, D. *et al.* Novel substrates for the automated and manual assay of endo-1,4- $\beta$ -xylanase. *Carbohydr. Res.* **445**, 14–22 (2017).
  72. Sun, L., Petrounia, I. P., Yagasaki, M., Bandara, G. & Arnold, F. H. Expression and stabilization of galactose oxidase in Escherichia coli by directed evolution. *Protein Eng.* **14**, 699–704 (2001).
  73. Thomas, B. *et al.* Application of Biocatalysis to on-DNA Carbohydrate Library Synthesis. *Chem-BioChem.* **18**, 858–863 (2017).
  74. Matthey, A. P. *et al.* Selective Oxidation of N-Glycolylneuraminic Acid Using an Engineered Galactose Oxidase Variant. *ACS Catal.* **9**, 8208–8212 (2019).
